# Supplementary material for: The H2sensing properties of facets-dependent Pd nanoparticles-supported ZnO nanorods
Source: Royal Society of Chemistry journal article supplement (doi:10.1039/c8dt01980k), 2018-01-01
Supplement: c8dt01980k1.pdf [file c8dt01980k1.pdf]

## Supporting Information

### **The H<sub>2</sub> sensing properties of facets-dependence Pd nanoparticles supported ZnO nanorods**

*Zhilei Tang,<sup>1,2</sup> Yi Zhang,<sup>1,3</sup> Xiaochuan Deng,<sup>1</sup> Yujie Dai,<sup>1</sup> Wending Zhang,<sup>1,3</sup> Faying  
Fan,<sup>1,\*</sup>, Binju Qing,<sup>1</sup> Chaoliang Zhu,<sup>1</sup> Jie Fan,<sup>1</sup> Yifei Shi<sup>1</sup>*

*1, Key Laboratory of Comprehensive and Highly Efficient Utilization of Salt Lake Resources,*

*Qinghai Engineering and Technology Research Center of Comprehensive Utilization of Salt Lake Resources,*

*Qinghai Institute of Salt Lake, Chinese Academy of Sciences, Xining 810008, China*

*2. Qinghai Taifeng Pulead Lithium Energy Technology Co., Ltd, Xining, 810021, China*

*3. University of Chinese Academy of Science, Beijing, 10049, China*

### **Corresponding Author**

\*E-mail: fanfy@isl.ac.cn

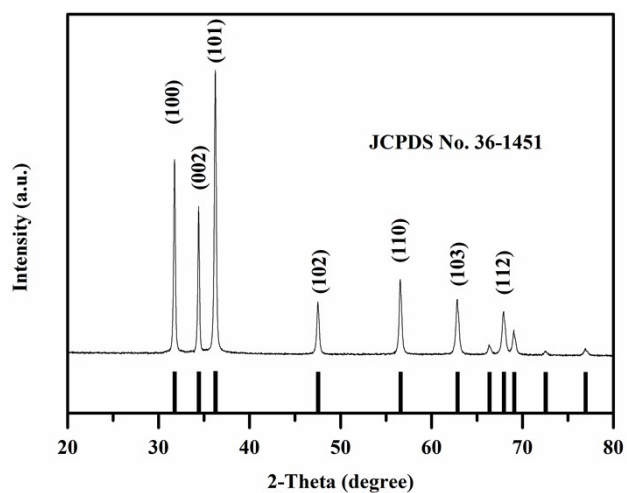

**Fig. S1** XRD pattern of ZnO flower-like hierarchical Structures composed by 1-D nanorods

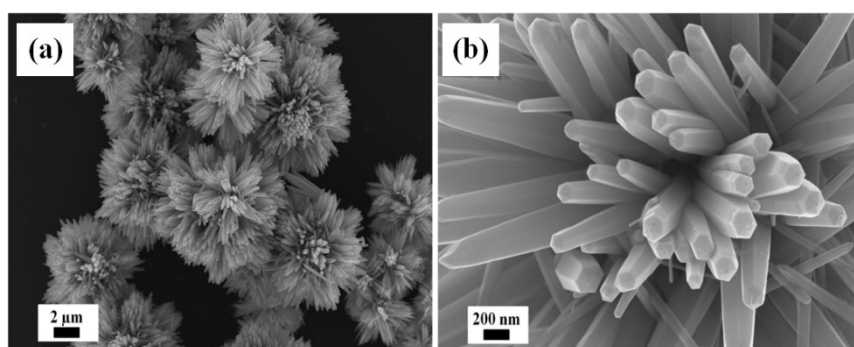

**Fig. S2** SEM images of the ZnO flower-like hierarchical Structures composed by 1-D nanorods.

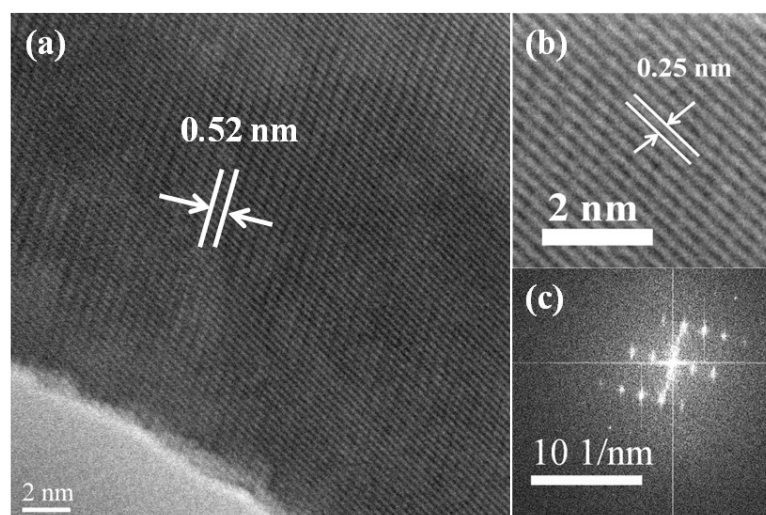

**Fig. S3** HRTEM images (a and b) and SAED patterns (c) of the ZnO flower-like hierarchical Structures composed by 1-D nanorods.

The morphology and structures of ZnO nanorods reported in our previous work was demonstrated.<sup>1</sup> The XRD pattern shown in Fig. S1 demonstrates its better crystallinity for ZnO hexagonal structures, and match well with JCPDS PDF card No. 36-1451. Fig. S2 shows the SEM images of the ZnO, indicating that the ZnO are flower-like hierarchical structure composed by nanorods. The diameter of the flowers and nanorods are about 6  $\mu\text{m}$  and hundreds nanometers. Fig. 3 shows the HRTEM images of ZnO sample. The clear observation of the well-defined lattice fringes indicates that those obtained ZnO nanorod is single crystal. The lattice spaces are measured to be equal to 0.25 and 0.52 nm, corresponding to the (101) and (001) crystal plane of hexagonal wurtzite ZnO, and the direction of growth of nanorods is along  $\langle 002 \rangle$ . The selected-area electron diffraction pattern of ZnO nanorods are shown in Fig. S3(c), and it is indicates the ZnO nanorod is single crystalline with hexagonal wurtzite structure, and the direction of the growth of the ZnO nanorods along  $\langle 002 \rangle$ .<sup>2</sup>

## References

- [1] S. Bai, X. Liu, D. Li, S. Chen, R. Luo, A. Chen, *Sens. Actuators, B*, 2011, **153**, 110-116.
- [2] S. Kundu, S. Sain, B. Satpati, S. R. Bhattacharyya, S. K. Pradhan, *RSC Adv.*, 2015, **5**, 23101-23113.
